# Supplementary material
Source: Springer Nature journal article supplement (https://www.springermedizin.de/resource/supplementary/12987_2007_283_MOESM4_ESM.pdf/9611710)

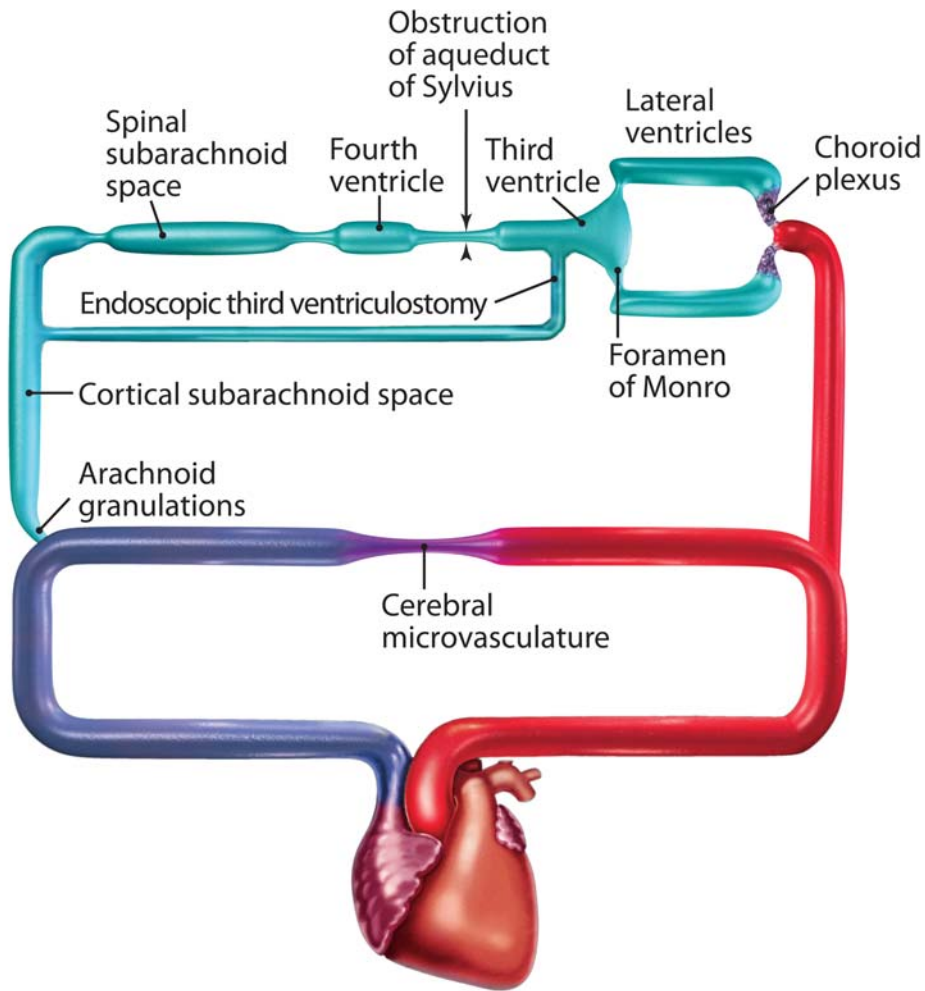

Supplement: MOESM4 [file 9611710]
